# Supplementary material for: Sexual consent and chemsex: a quantitative study on sexualised drug use and non-consensual sex among men who have sex with men in Amsterdam, the Netherlands
Source: PubMed Central journal article supplement (PMC8165144; doi:10.1136/sextrans-2020-054840), 2021-04-08
Supplement: sextrans-2020-054840supp001.pdf [file sextrans-2020-054840supp001.pdf]

**Supplement Table 1. Specific types of non-consensual sex (NCS) experiences in relation to any amount of reported current suffering.**

|                                                                                             | Any amount of suffering, | No suffering at all, | Total (missing n=4) |
|---------------------------------------------------------------------------------------------|--------------------------|----------------------|---------------------|
|                                                                                             | 96 (61.1%)               | 61 (38.9%)           | 157                 |
| <b>Types of NCS experienced (multiple answers possible)<sup>1</sup></b>                     |                          |                      |                     |
| Filmed/photographed without consent                                                         | 13 (44.8)                | 16 (55.2)            | 29                  |
| Blackmailed (e.g. with images)                                                              | 8 (100)                  | 0                    | 8                   |
| Used drugs against my will                                                                  | 16 (84.2)                | 3 (15.8)             | 19                  |
| Touched against my will                                                                     | 35 (64.8)                | 19 (35.2)            | 54                  |
| Had sexual contact against my will                                                          | 36 (67.9)                | 17 (32.1)            | 53                  |
| Had sex without a condom against my will                                                    | 30 (78.9)                | 8 (21.1)             | 38                  |
| I passed out and don't remember (under influence of chems, other substances and/or alcohol) | 22 (66.7)                | 11 (33.3)            | 33                  |
| I crossed the limits of my sex partner                                                      | 8 (66.7)                 | 4 (33.3)             | 12                  |
| Other                                                                                       | 3 (60.0)                 | 2 (40.0)             | 5                   |

<sup>1</sup> Multiple answers possible. A total of 251 types of NCS were reported by 157 individuals.

**Supplement Table 2. Timeframe of one's last of non-consensual sex experiences in relation to any amount of reported current suffering.**

|                 | Any amount of suffering, n=95 (61.1%), n (%) | No suffering at all, n= 61 (38.9%) | Total n=156 (%), n (%) (missing n=5) |
|-----------------|----------------------------------------------|------------------------------------|--------------------------------------|
| Timeframe       |                                              |                                    |                                      |
| Past month      | 10 (76.9)                                    | 3 (23.1)                           | 13                                   |
| 1-3 months ago  | 15 (78.9)                                    | 4 (21.1)                           | 19                                   |
| 3-6 months ago  | 10 (55.6)                                    | 8 (44.4)                           | 18                                   |
| 6-12 months ago | 10 (50.0)                                    | 10 (50.0)                          | 20                                   |
| >1 year ago     | 50 (58.1)                                    | 36 (41.9)                          | 86                                   |
